# Supplementary material
Source: PubMed Central journal article supplement (PMC5993198)

# SUPPLEMENTARY FIGURE S1

(a)

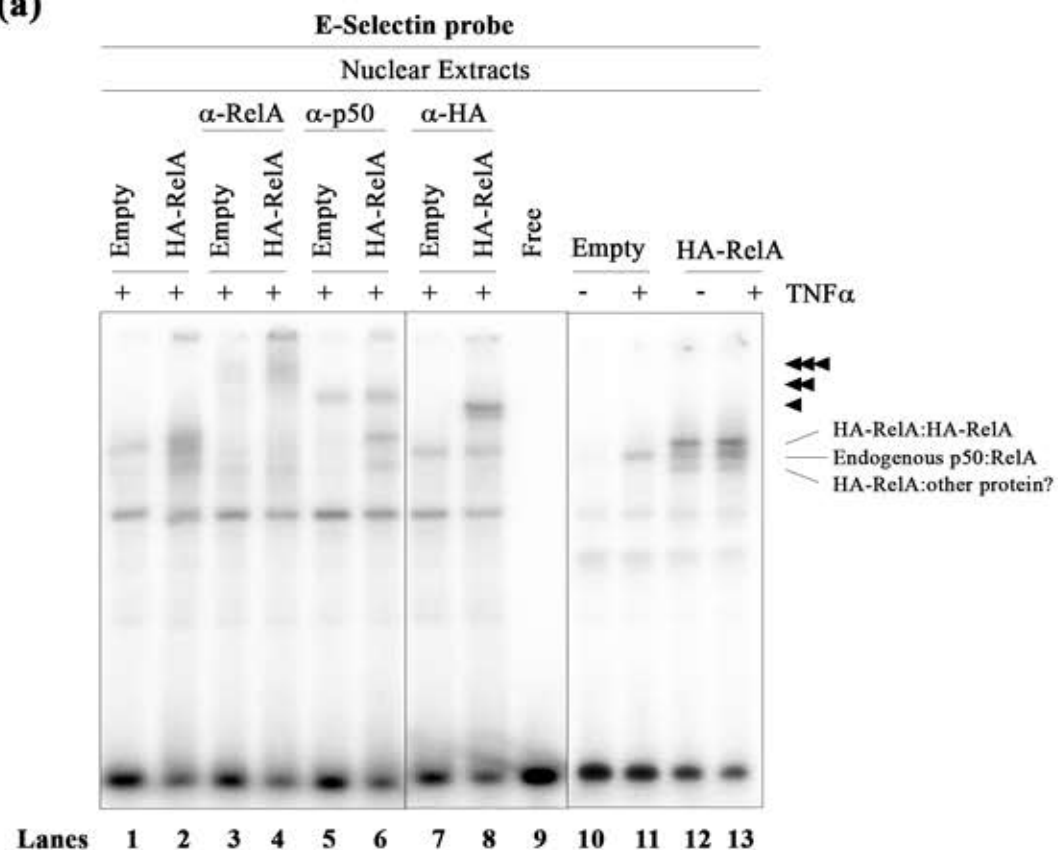

(b)

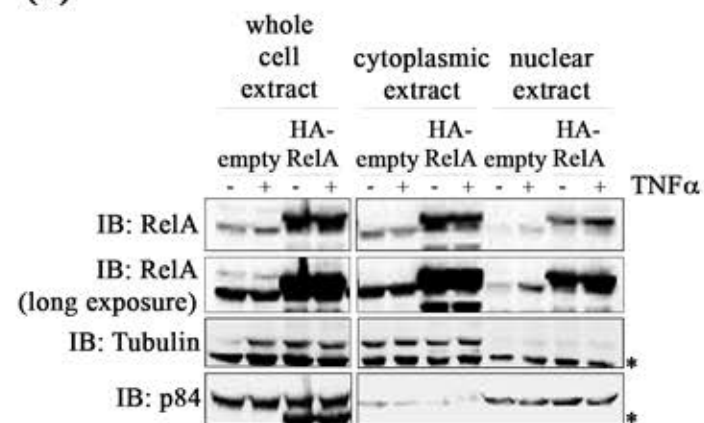

Supplement: NIHMS967842-supplement-Sup_Fig1.pdf [file NIHMS967842-supplement-Sup_Fig1.pdf]

# SUPPLEMENTARY FIGURE S2

(a)

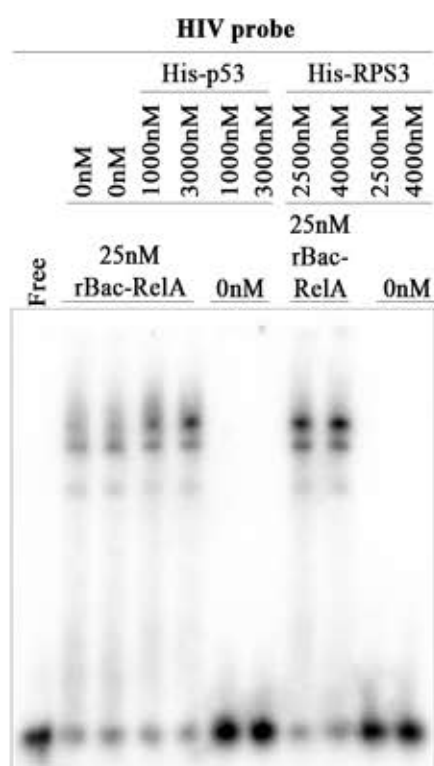

(b)

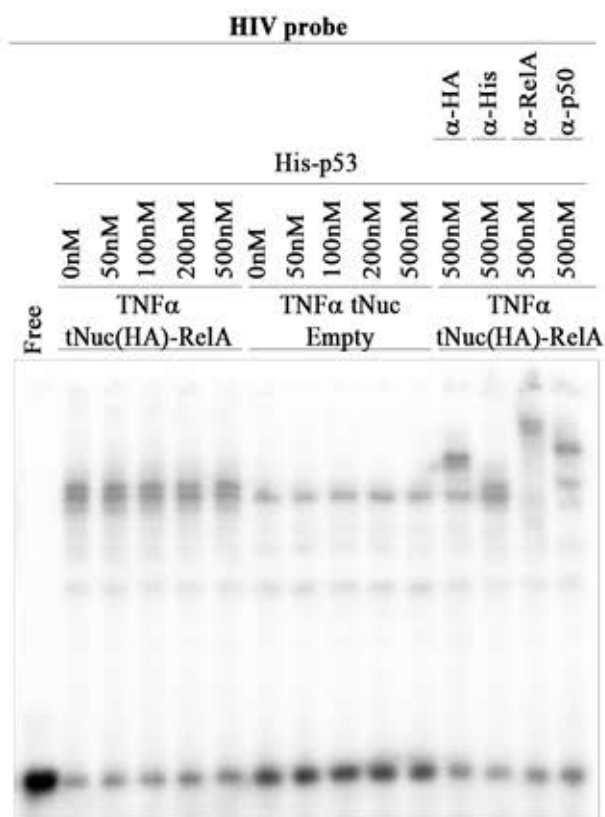

(c)

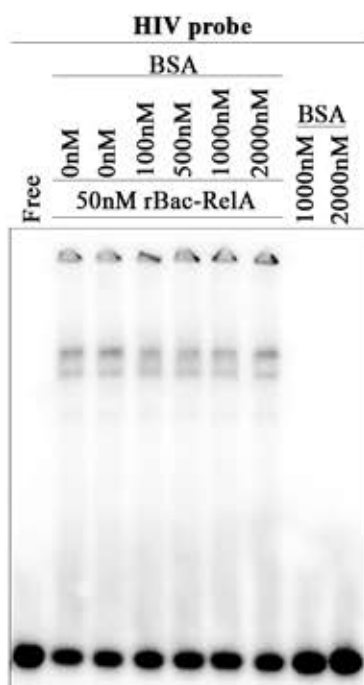

(d)

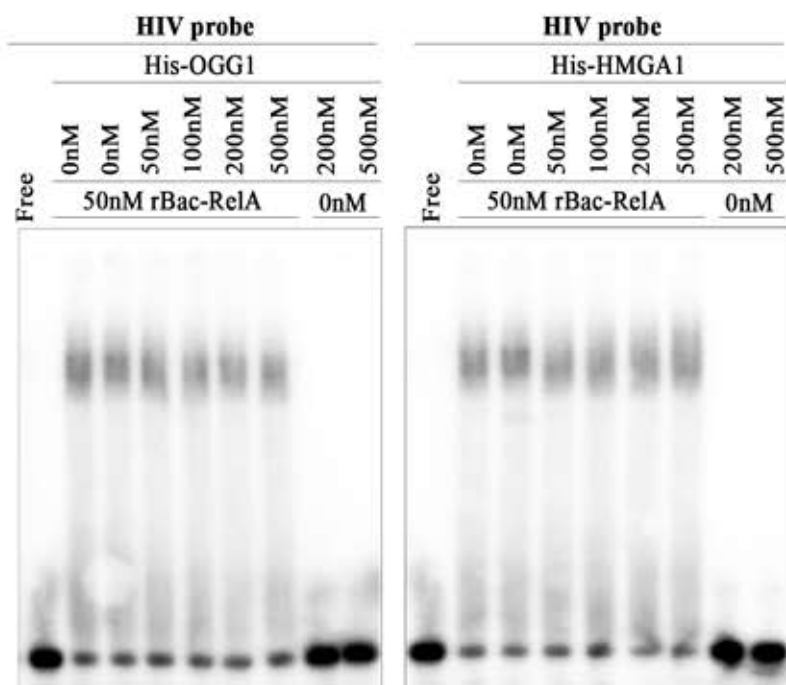

Supplement: NIHMS967842-supplement-Sup_Fig2.pdf [file NIHMS967842-supplement-Sup_Fig2.pdf]

**SUPPLEMENTARY FIGURE S3**

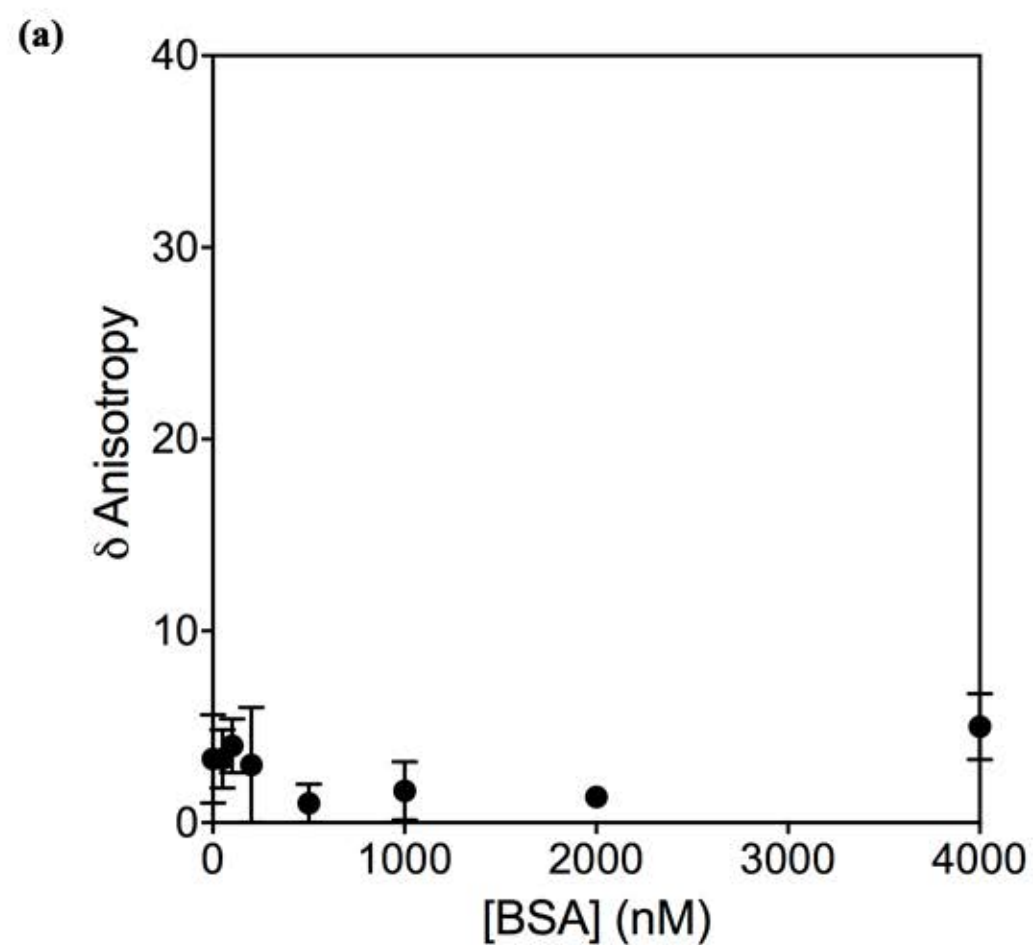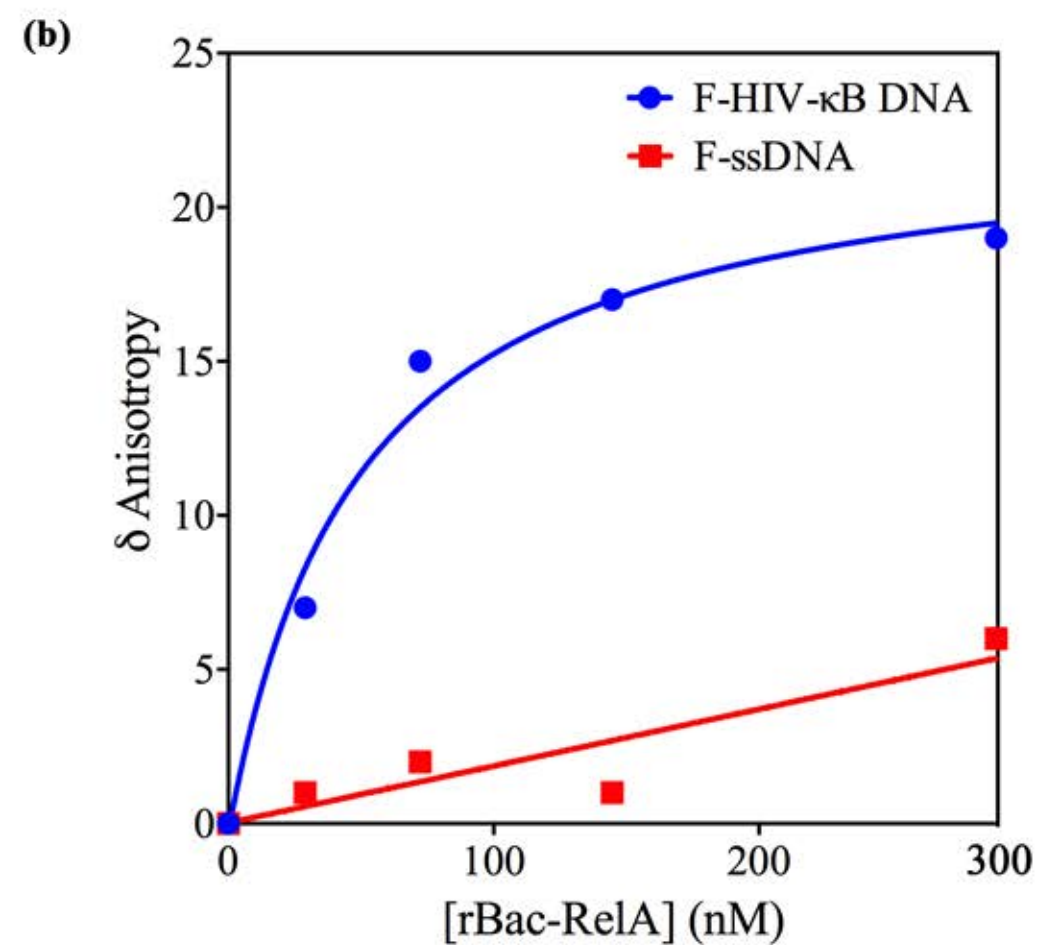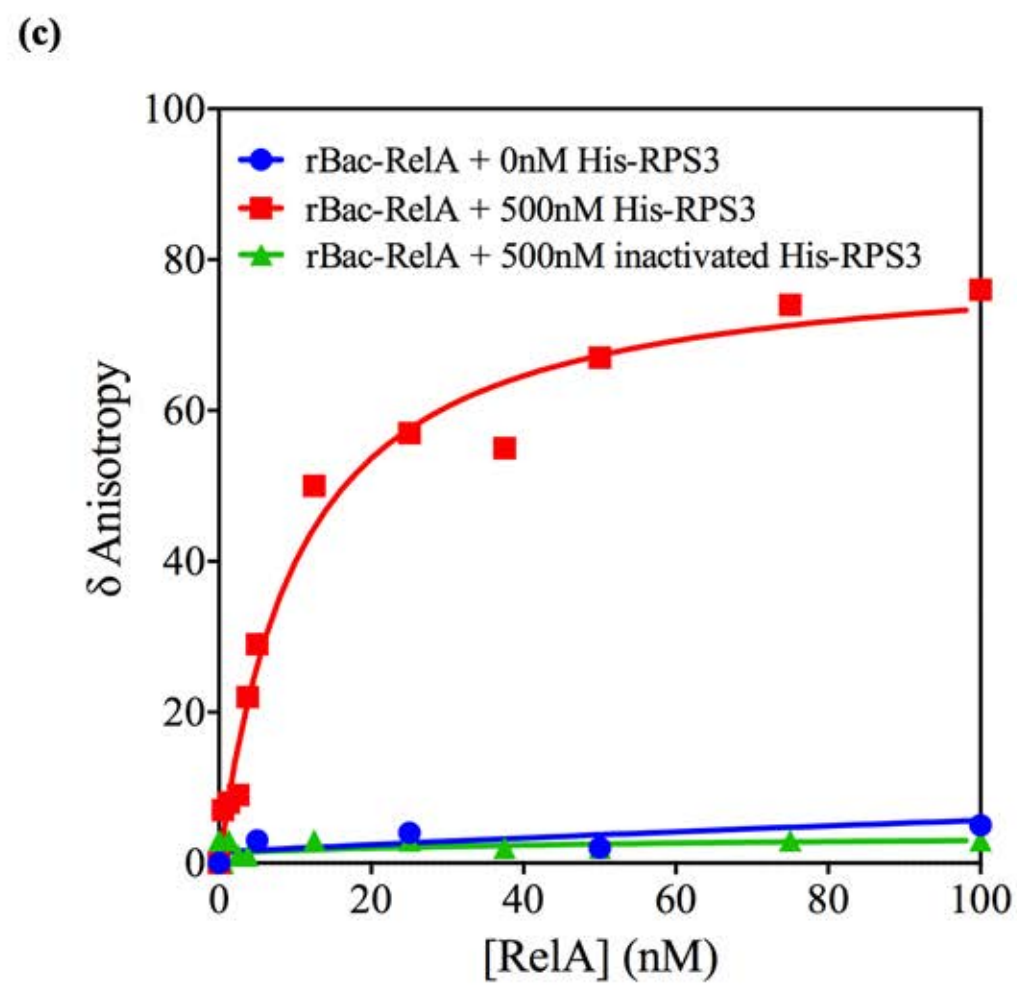

Supplement: NIHMS967842-supplement-Sup_Fig3.pdf [file NIHMS967842-supplement-Sup_Fig3.pdf]

**SUPPLEMENTARY FIGURE S4**

**(a)**

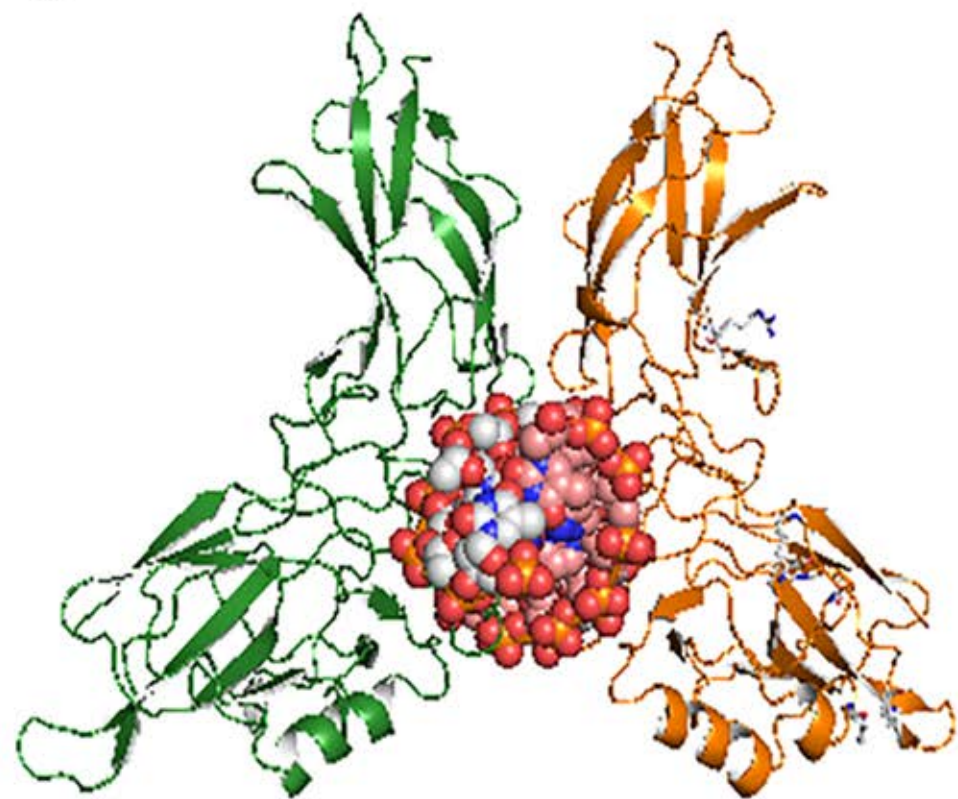

**(b)**

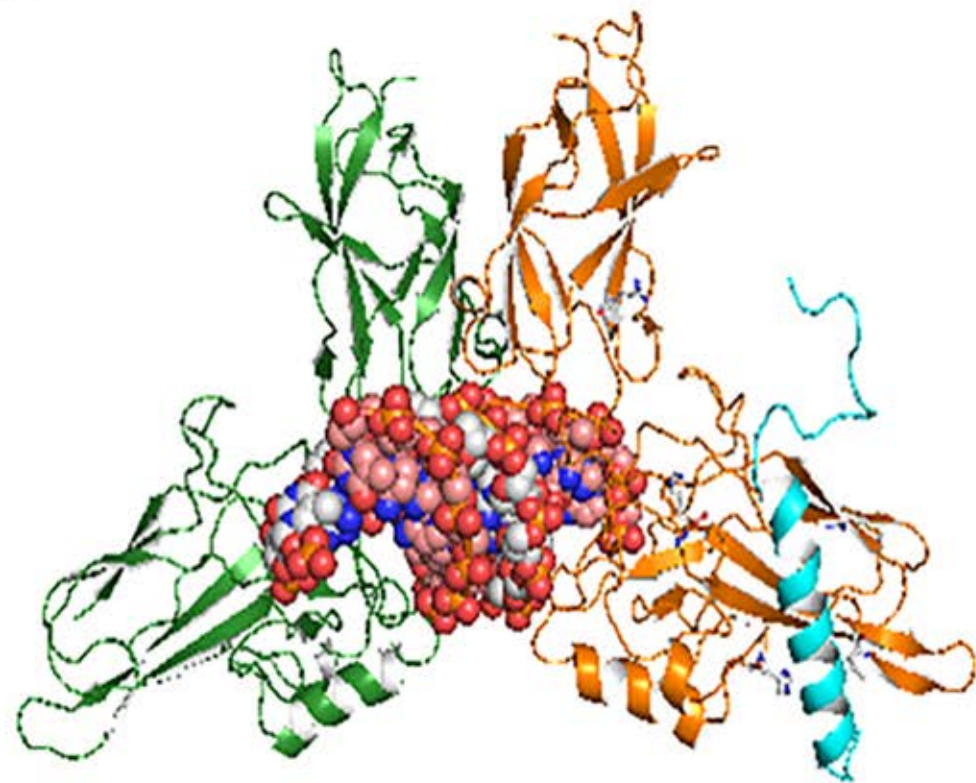

Supplement: NIHMS967842-supplement-Sup_Fig4.pdf [file NIHMS967842-supplement-Sup_Fig4.pdf]
